# Supplementary material
Source: PubMed Central journal article supplement (PMC7936352)
Supplement: jamaneurol-e210504-s002.pdf [file jamaneurol-e210504-s002.pdf]

Supplemental Online Content: Nonauthor Collaborators

\*Indicates required information. Only first name, last name, and suffix will appear in PubMed.

**Group Name: \* Overcoming COVID-19 Investigators**

| First Name and Middle Initial(s)* | Last Name* | Suffix* | Academic Degrees | Institution                                                         | Location (city, state/province, country) | Role or Contribution, eg, chair, principal investigator | Subgroup, eg, Steering Committee |
|-----------------------------------|------------|---------|------------------|---------------------------------------------------------------------|------------------------------------------|---------------------------------------------------------|----------------------------------|
| Mary G                            | Gaspers    |         | MD               | University of Arizona                                               | Tucson, Arizona                          |                                                         |                                  |
| Katri V                           | Typpo      |         | MD               | University of Arizona                                               | Tucson, Arizona                          |                                                         |                                  |
| Ronald C                          | Sanders    |         | MD, MS           | Arkansas Children's Hospital                                        | Little Rock, Arkansas                    |                                                         |                                  |
| Adam J                            | Schwarz    |         | MD               | Children's Hospital of Orange County                                | Orange County, California                |                                                         |                                  |
| Helen                             | Harvey     |         | MD, MS           | Rady Children's Hospital                                            | San Diego, California                    |                                                         |                                  |
| Matt S                            | Zinter     |         | MD               | University of California, San Francisco Benioff Children's Hospital | San Francisco, California                |                                                         |                                  |
| Peter M                           | Mourani    |         | MD               | Children's Hospital Colorado                                        | Aurora, Colorado                         |                                                         |                                  |
| Bria M                            | Coates     |         | MD               | Ann & Robert H. Lurie Children's Hospital of Chicago                | Chicago, Illinois                        |                                                         |                                  |
| Guru                              | Bhoojhawon |         | MBBS, MD         | University of Iowa Stead Family Children's Hospital                 | Iowa City, Iowa                          |                                                         |                                  |
| Kevin M                           | Havlin     |         | MD               | University of Louisville and Norton Children's Hospital             | Louisville, Kentucky                     |                                                         |                                  |
| Vicki L                           | Montgomery |         | MD               | University of Louisville and Norton Children's Hospital             | Louisville, Kentucky                     |                                                         |                                  |
| Janice E                          | Sullivan   |         | MD               | University of Louisville and Norton Children's Hospital             | Louisville, Kentucky                     |                                                         |                                  |
| Tamara T                          | Bradford   |         | MD               | Children's Hospital of New Orleans                                  | New Orleans, Louisiana                   |                                                         |                                  |
| Melania M                         | Bembea     |         | MD, MPH, PhD     | Johns Hopkins Children's Hospital                                   | Baltimore, Maryland                      |                                                         |                                  |
| Susan V                           | Lipton     |         | MD, MPH          | Sinai Hospital of Baltimore                                         | Baltimore, Maryland                      |                                                         |                                  |
| Ana Lia                           | Graciano   |         | MD               | University of Maryland Children's Hospital                          | Baltimore, Maryland                      |                                                         |                                  |
| Sabrina R                         | Chen       |         |                  | Boston Children's Hospital                                          | Boston, Massachusetts                    |                                                         |                                  |
| Suden                             | Kucukak    |         | MD               | Boston Children's Hospital                                          | Boston, Massachusetts                    |                                                         |                                  |
| Jane W                            | Newburger  |         | MD               | Boston Children's Hospital                                          | Boston, Massachusetts                    |                                                         |                                  |

Supplemental Online Content: Nonauthor Collaborators

\*Indicates required information. Only first name, last name, and suffix will appear in PubMed.

| First Name and Middle Initial(s)* | Last Name*        | Suffix* | Academic Degrees | Institution                                   | Location (city, state/province, country) | Role or Contribution, eg, chair, principal investigator | Subgroup, eg, Steering Committee |
|-----------------------------------|-------------------|---------|------------------|-----------------------------------------------|------------------------------------------|---------------------------------------------------------|----------------------------------|
| Ryan W                            | Carroll           |         | MD, MPH          | MassGeneral Hospital for Children             | Boston, Massachusetts                    |                                                         |                                  |
| Neil D                            | Fernandes         |         | MBBS             | MassGeneral Hospital for Children             | Boston, Massachusetts                    |                                                         |                                  |
| Phoebe H                          | Yager             |         | MD               | MassGeneral Hospital for Children             | Boston, Massachusetts                    |                                                         |                                  |
| Kimberly L                        | Marohn            |         | MD               | Baystate Children's Hospital                  | Springfield, Massachusetts               |                                                         |                                  |
| Sabrina M                         | Heidemann         |         | MD               | Children's Hospital of Michigan               | Detroit, Michigan                        |                                                         |                                  |
| Melissa L                         | Cullimore         |         | MD, PhD          | Children's Hospital and Medical Center        | Omaha, Nebraska                          |                                                         |                                  |
| Russell J                         | McCulloh          |         | MD               | Children's Hospital and Medical Center        | Omaha, Nebraska                          |                                                         |                                  |
| Steven M                          | Horwitz           |         | MD               | Bristol-Myers Squibb Children's Hospital      | New Brunswick, New Jersey                |                                                         |                                  |
| Simon                             | Li                |         | MD, MPH          | Bristol-Myers Squibb Children's Hospital      | New Brunswick, New Jersey                |                                                         |                                  |
| Rowan F                           | Walsh             |         | MD               | Newark Beth Israel Medical Center             | Newark, New Jersey                       |                                                         |                                  |
| Adam J                            | Ratner            |         | MD, MPH          | Hassenfeld Children's Hospital at NYU Langone | New York, New York                       |                                                         |                                  |
| Vijaya L                          | Soma              |         | MD               | Hassenfeld Children's Hospital at NYU Langone | New York, New York                       |                                                         |                                  |
| Jennifer K                        | Gillen            |         | MD               | The Mount Sinai Hospital                      | New York, New York                       |                                                         |                                  |
| Sheemon P                         | Zackai            |         | MD               | The Mount Sinai Hospital                      | New York, New York                       |                                                         |                                  |
| Kate G                            | Ackerman          |         | MD               | Golisano Children's Hospital                  | Rochester, New York                      |                                                         |                                  |
| Jill M                            | Cholette          |         | MD               | Golisano Children's Hospital                  | Rochester, New York                      |                                                         |                                  |
| Ilana                             | Harwayne-Gidansky |         | MD               | Stony Brook University Hospital               | Stony Brook, New York                    |                                                         |                                  |
| Saul R                            | Hymes             |         | MD               | Stony Brook University Hospital               | Stony Brook, New York                    |                                                         |                                  |
| Philip J                          | Overby            |         | MD               | Maria Fareri Children's Hospital              | Valhalla, New York                       |                                                         |                                  |

Supplemental Online Content: Nonauthor Collaborators

\*Indicates required information. Only first name, last name, and suffix will appear in PubMed.

| First Name and Middle Initial(s)* | Last Name*     | Suffix* | Academic Degrees | Institution                                                        | Location (city, state/province, country) | Role or Contribution, eg, chair, principal investigator | Subgroup, eg, Steering Committee |
|-----------------------------------|----------------|---------|------------------|--------------------------------------------------------------------|------------------------------------------|---------------------------------------------------------|----------------------------------|
| Stephanie P                       | Schwartz       |         | MD               | University of North Carolina at Chapel Hill                        | Chapel Hill, North Carolina              |                                                         |                                  |
| Amanda N                          | Lansell        |         | MD               | University Hospitals Rainbow Babies and Children's Hospital        | Cleveland, Ohio                          |                                                         |                                  |
| Monica L                          | Koncicki       |         | MD               | St. Christopher's Hospital for Children                            | Philadelphia, Pennsylvania               |                                                         |                                  |
| Joseph                            | Carcillo       |         | MD               | UPMC Children's Hospital of Pittsburgh                             | Pittsburgh, Pennsylvania                 |                                                         |                                  |
| Ericka                            | Fink           |         | MD               | UPMC Children's Hospital of Pittsburgh                             | Pittsburgh, Pennsylvania                 |                                                         |                                  |
| Dai                               | Kimura         |         | MD               | Le Bonheur Children's Hospital                                     | Memphis, Tennessee                       |                                                         |                                  |
| Cindy                             | Bowens         |         | MD, MSCS         | University of Texas Southwestern, Children's Medical Center Dallas | Dallas, Texas                            |                                                         |                                  |
| Hillary Lincoln S                 | Crandall Smith |         | MD, PhD          | Primary Children's Hospital                                        | Salt Lake City, Utah                     |                                                         |                                  |
| Pelin                             | Cengiz         |         | MD               | Seattle Children's Hospital                                        | Seattle, Washington                      |                                                         |                                  |
|                                   |                |         | MD               | University of Wisconsin-Madison                                    | Madison, Wisconsin                       |                                                         |                                  |
